# Supplementary material for: Reference database design for the automated analysis of microplastic samples based on Fourier transform infrared (FTIR) spectroscopy
Source: PubMed Central journal article supplement (PMC6113679; doi:10.1007/s00216-018-1156-x), 2018-07-06
Supplement: 216_2018_1156_MOESM1_ESM.pdf [file 216_2018_1156_MOESM1_ESM.pdf]

## **Analytical and Bioanalytical Chemistry**

### **Electronic Supplementary Material**

#### **Reference database design for the automated analysis of microplastic samples based on Fourier transform infrared (FTIR) spectroscopy**

Sebastian Primpke, Marisa Wirth, Claudia Lorenz, Gunnar Gerdtz

Four additional files available as [10.1007/s00216-018-1156-x](https://doi.org/10.1007/s00216-018-1156-x)
