# Supplementary material for: Reference database design for the automated analysis of microplastic samples based on Fourier transform infrared (FTIR) spectroscopy
Source: PubMed Central journal article supplement (PMC6113679; doi:10.1007/s00216-018-1156-x), 2018-07-06
Supplement: 216_2018_1156_MOESM3_ESM.pdf [file 216_2018_1156_MOESM3_ESM.pdf]

**Electronic supplementary material for:**

**Reference Database Design for the Automated Analysis of Microplastic Samples based on Fourier Transform Infrared (FTIR) Spectroscopy**

S. Primpke,<sup>a,†,\*</sup> M. Wirth<sup>a,b,†</sup>, C. Lorenz,<sup>a</sup> and G. Gerdt<sup>a</sup>

<sup>a</sup>: Alfred-Wegener-Institute Helmholtz Centre for Polar and Marine Research, Biologische Anstalt Helgoland, Kurpromenade 201, 27498 Helgoland, Germany

<sup>b</sup>: Leibniz Institute for Baltic Sea Research Warnemünde, Seestraße 15, 18119 Rostock, Germany

<sup>†</sup>: These authors contributed equally to the manuscript

Corresponding author: e-mail: sebastian.primpke@awi.de, phone number: +49 4725 819 3255

**Figures:**

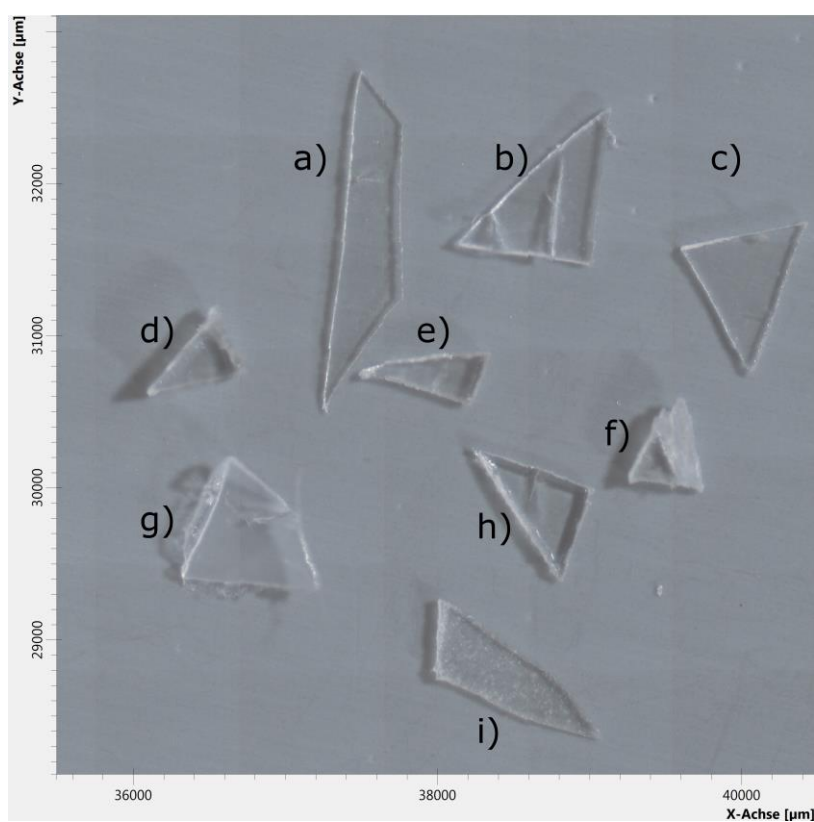

**Fig. S1** Reference filter RefA for the development of the adaptable database design. a) cellulose, b) polypropylene, c) polyamide, d) polyethylene terephthalate, e) polycarbonate, f) polystyrene, g) high density polyethylene, h) polyvinylchloride, i) polyesterurethane; For detailed information see Table S2.

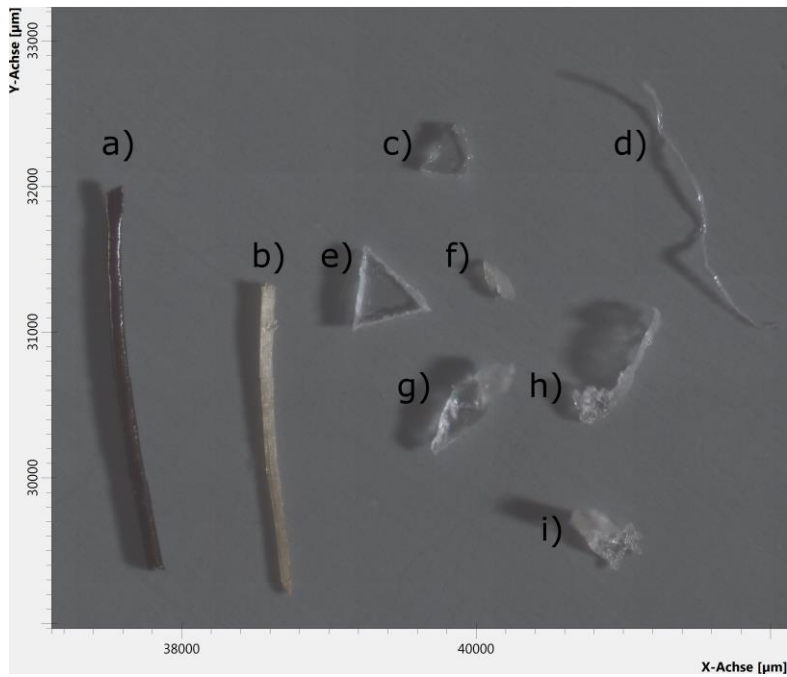

**Fig. S2** Reference filter RefB for the development of the adaptable database design. a) animal fur, b) cellulose, c) methyl vinyl ether/maleic acid copolymer, d) cellulose acetate, e) styrene acrylonitrile, f) acrylonitrile butadiene, g) ethylene methacrylic acid, h) polyoxomethylene, i) polysulfone; For detailed information see Table S3.

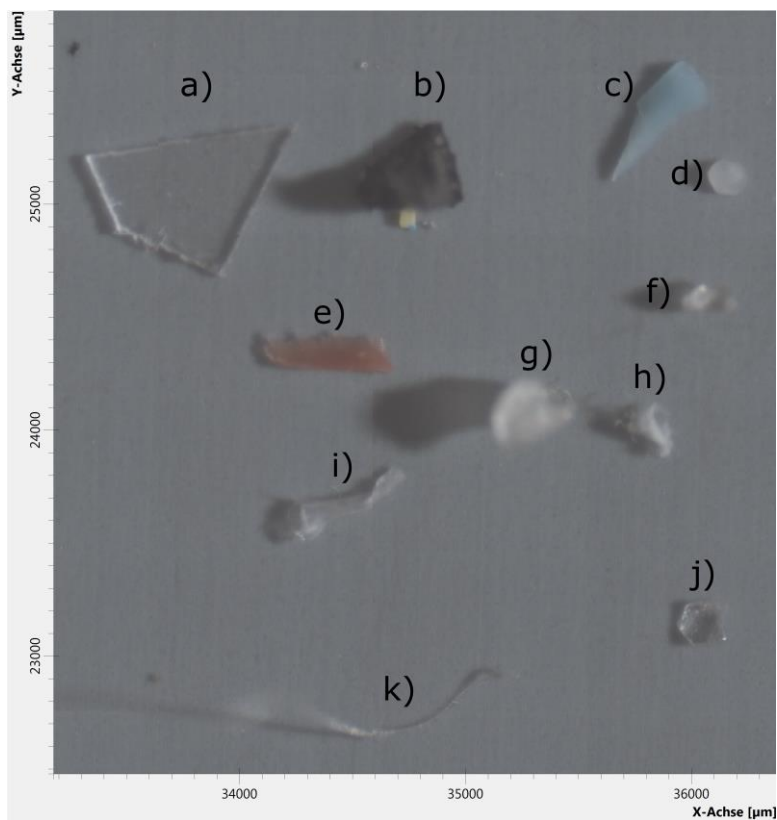

**Fig. S3** Reference filter RefC for the development of the adaptable database design. a) polylactic acid, b) black rubber, c) nitrile rubber, d) polyethylene, oxidized, e) silicone, f) polychloroprene, g) chitin, h) polycaprolactone, i) sand, k) animal fur; For detailed information see Table S4.

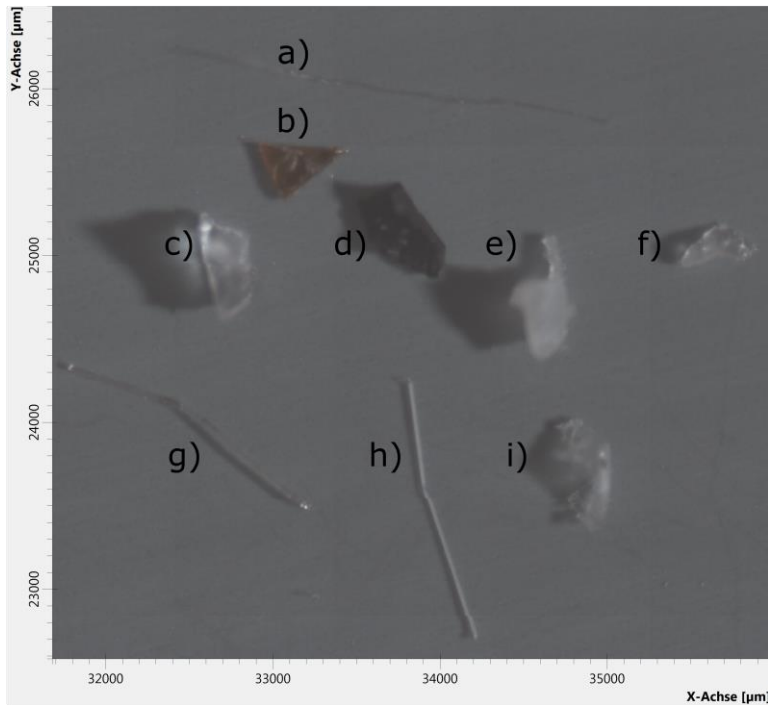

**Fig. S4** Reference filter RefD for the development of the adaptable database design. a) aramid, b) polyimide, c) ethylene vinyl alcohol, ethylene vinyl acetate copolymer (40 %), d) black rubber, e) polyhydroxy butyric acid, f) polybutadiene, g) polyetheretherketone, h) polylactid acid, i) ethylene vinyl alcohol, ethylene vinyl acetate copolymer (14%); For detailed information see Table S5.

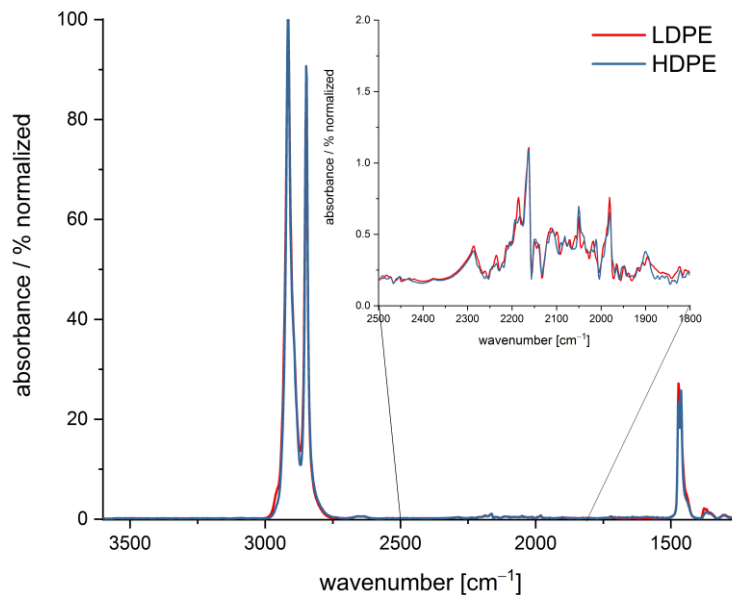

**Fig. S5** Exemplary spectra for HDPE and LDPE showing the ATR artefact in the range from 2475-1970  $\text{cm}^{-1}$  further highlighted by magnification of the data from 2500-1800  $\text{cm}^{-1}$ .

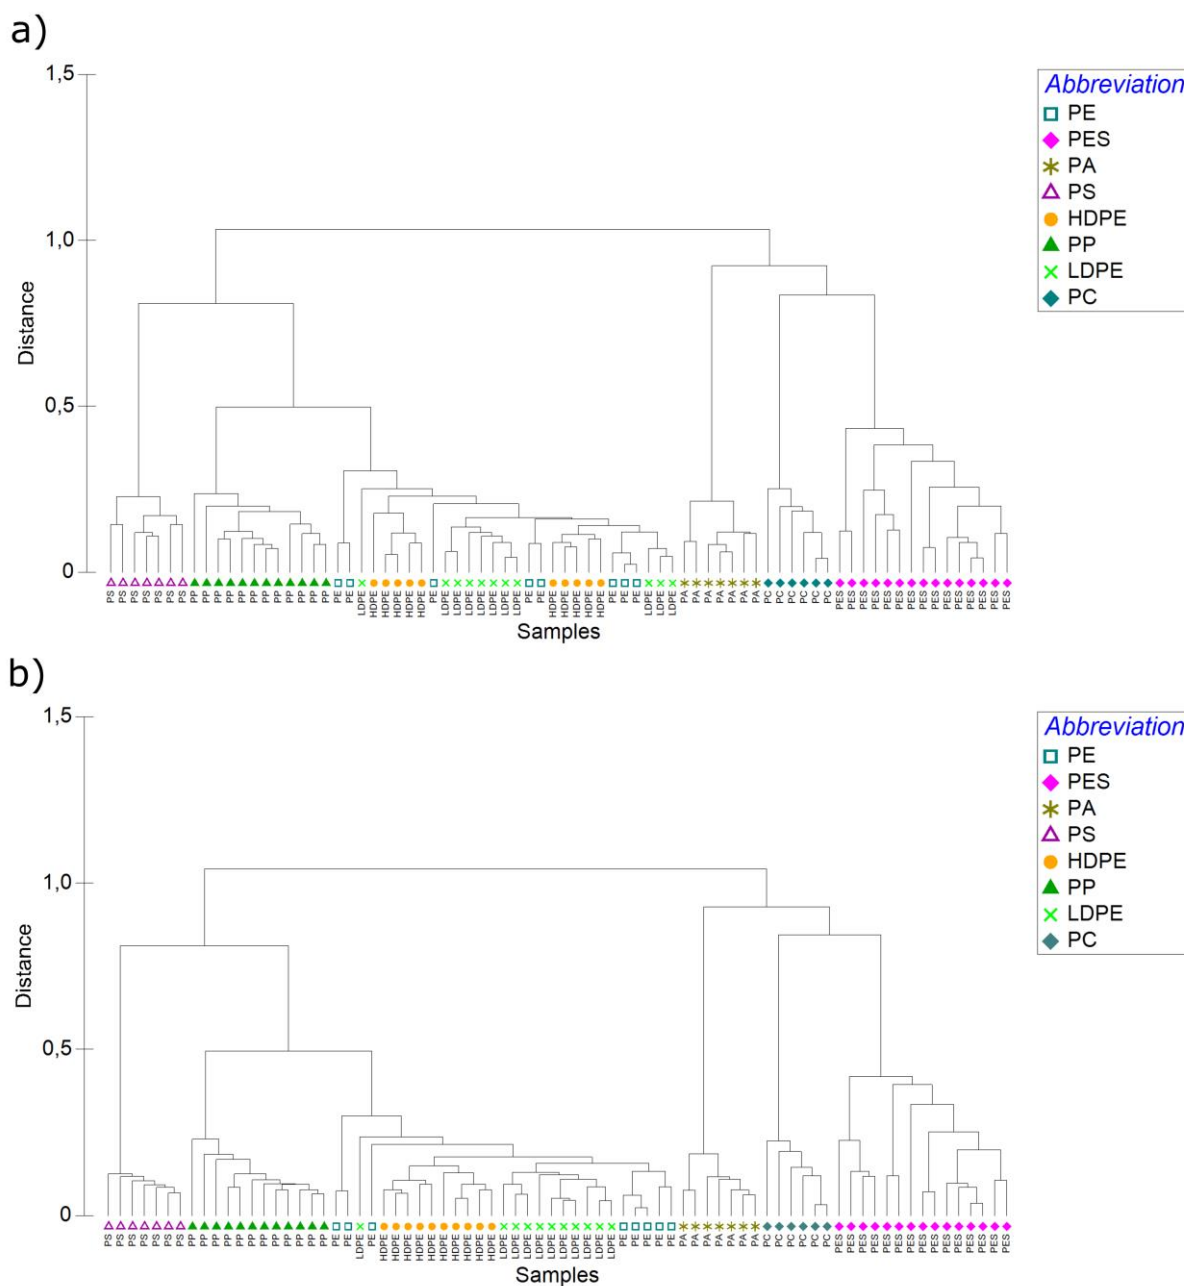

**Fig. S6** A) Hierarchical cluster analysis of a selection of spectra containing the ATR – artefact between 2475-1970  $\text{cm}^{-1}$ . B) Hierarchical cluster analysis after manipulation of the artefact to a straight line. Abbreviations: PS = polystyrene, PP = polypropylene, PE = polyethylene, LDPE = low density polyethylene, HPDE = high density polyethylene, PA = polyamide, PC = polycarbonate and PES = polyester.

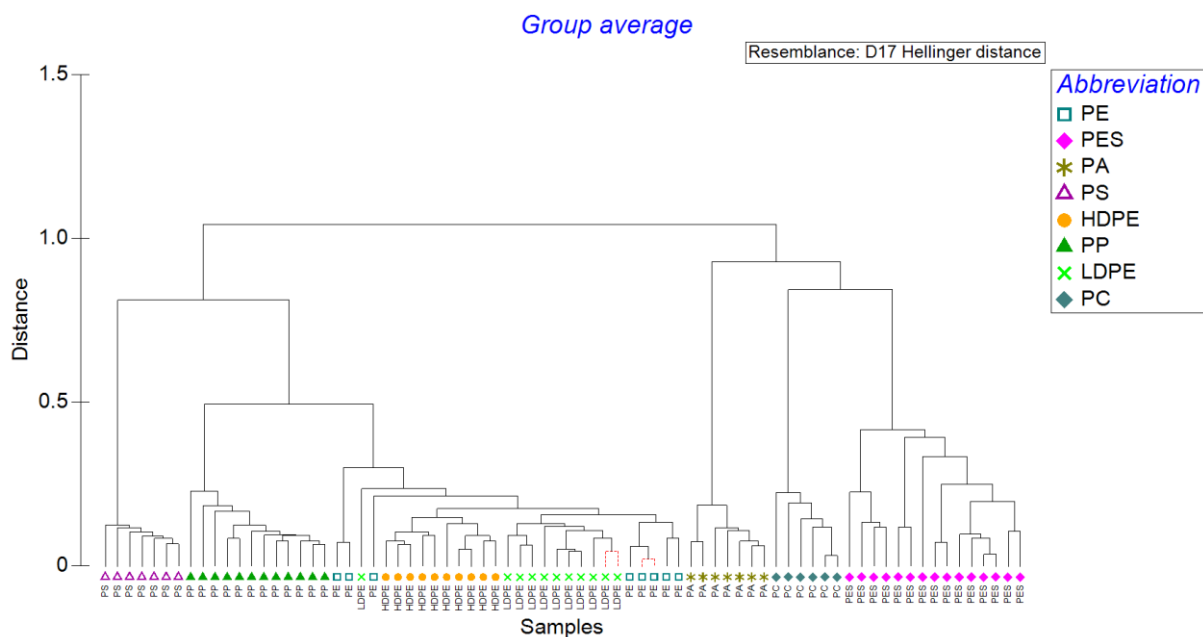

**Fig. S7** SIMPROF Abbreviations: PS = polystyrene, PP = polypropylene, PE = polyethylene, LDPE = low density polyethylene, HDPE = high density polyethylene, PA = polyamide, PC = polycarbonate and PES = polyester.

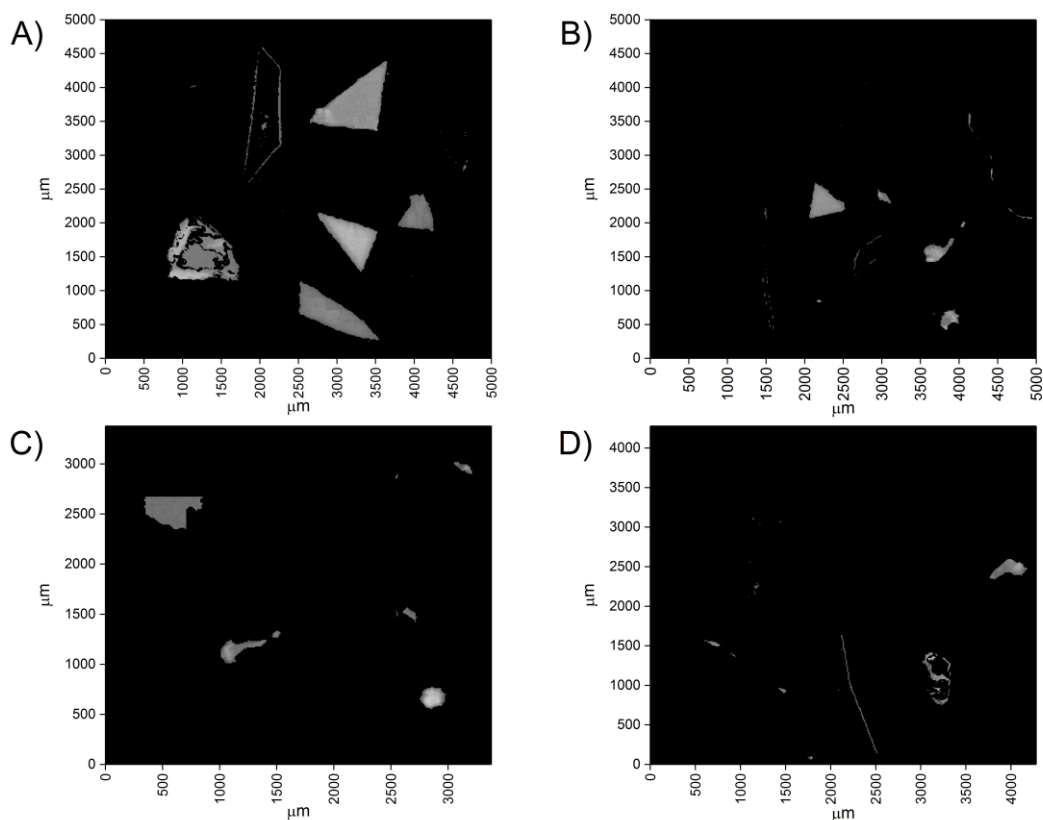

**Fig. S8** Intermediate results for the application of the database determined solely by manual cluster generation of ATR-FTIR-data on the filters RefA (A), RefB (B), RefC (C) and RefD (D) with the quality factor in greyscale.

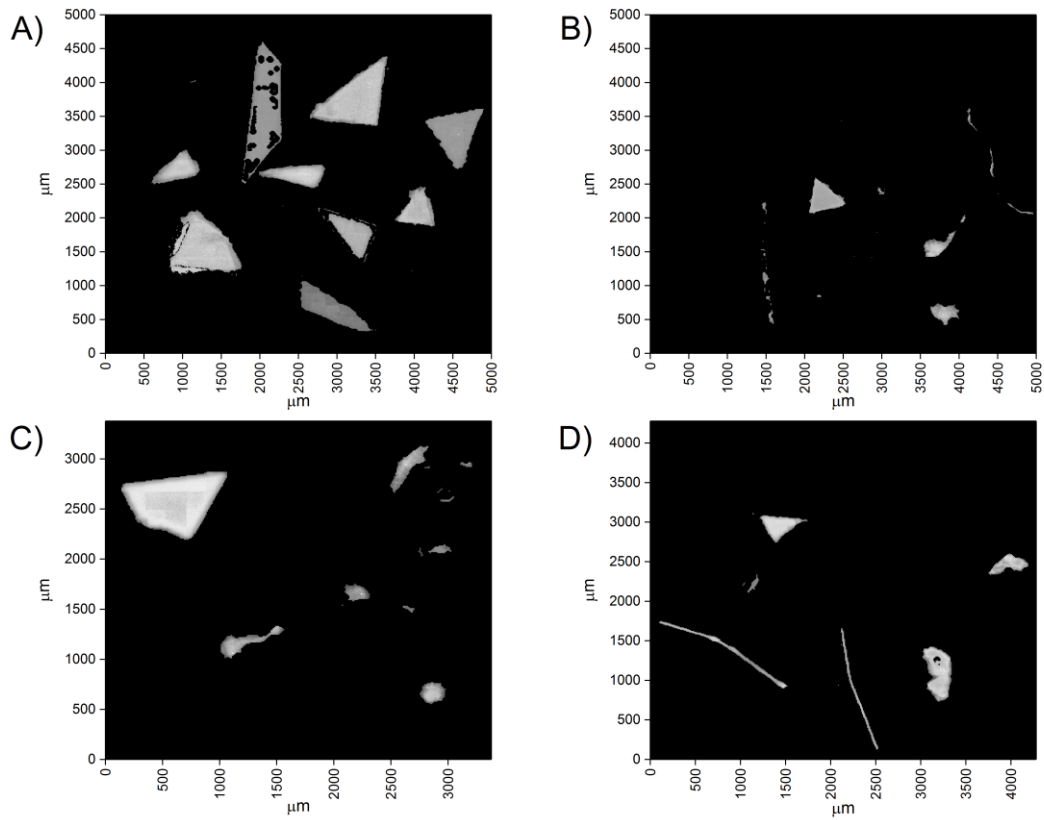

**Fig. S9** Final results for the application of adaptable database design on the data of filters RefA (A), RefB (B), RefC (C) and RefD (D) with the quality factor in greyscale.

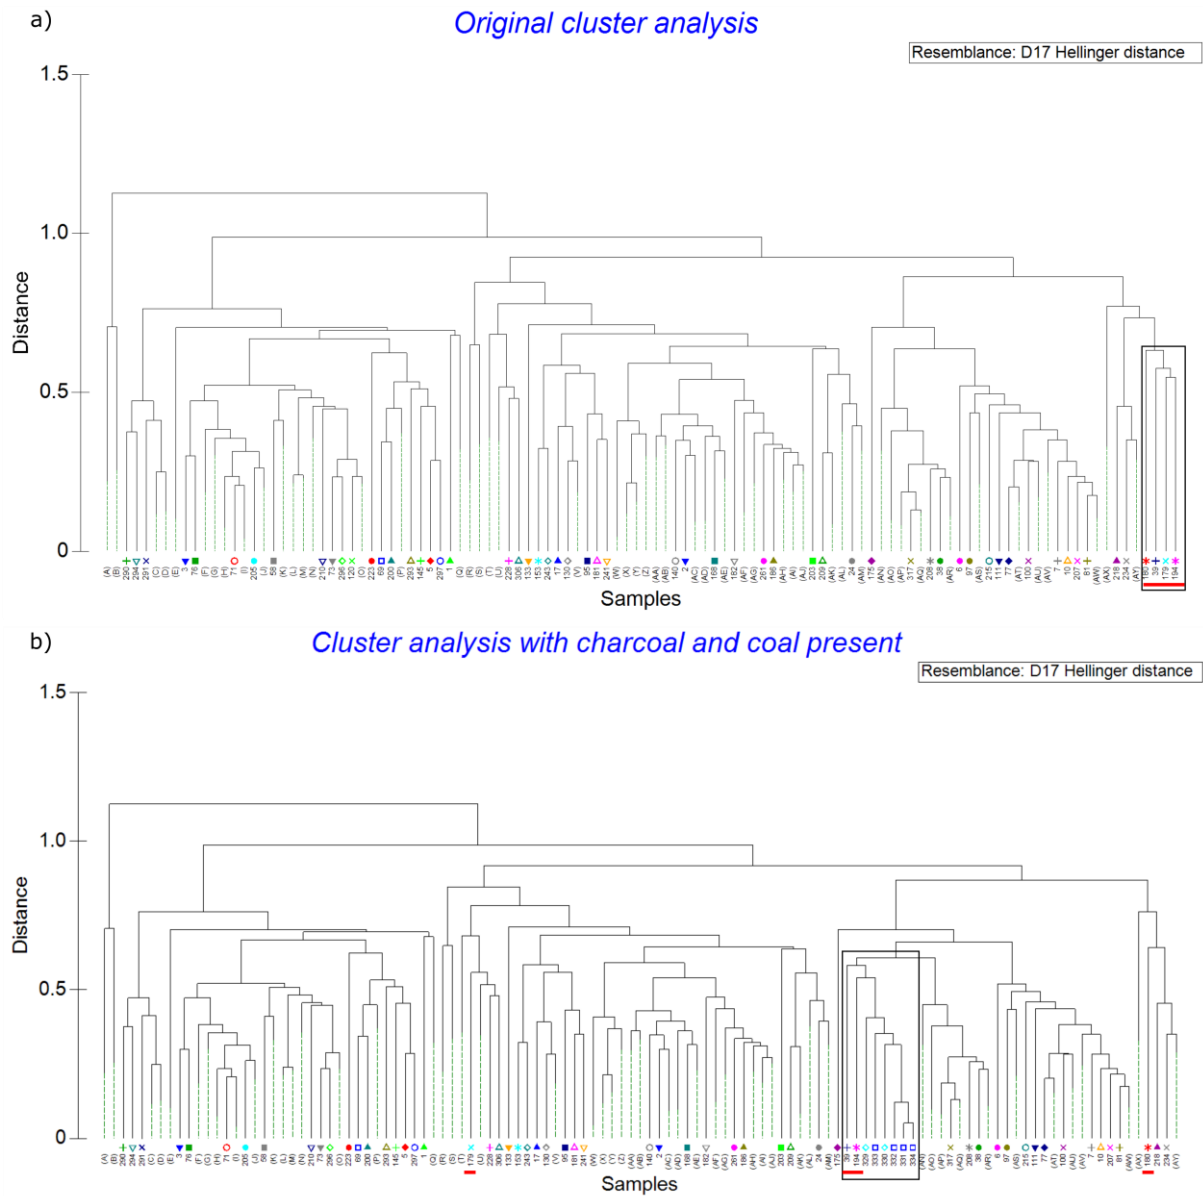

**Fig. S10** a) Cluster analysis prior to the introduction of coal spectra. b) Cluster analysis after the introduction of coal spectra. The changes within the dendrogram structure were highlighted by a black square and all cluster changing their position underlined by a red bar.

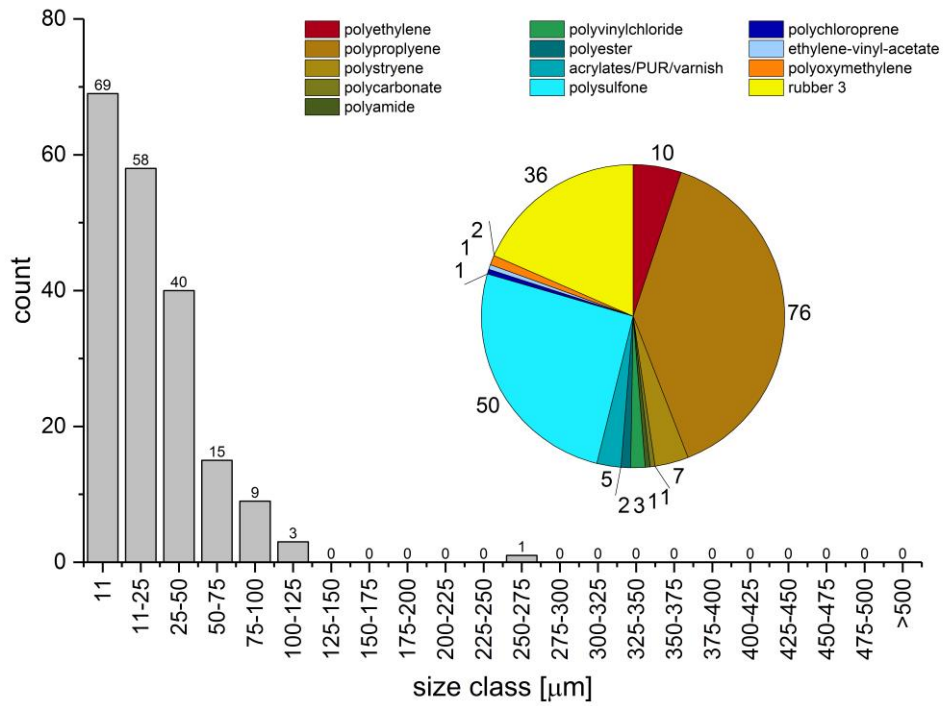

**Fig. S11** Size distribution and polymer composition for plastic particles derived via automated analysis for reference sample RefEnv1.



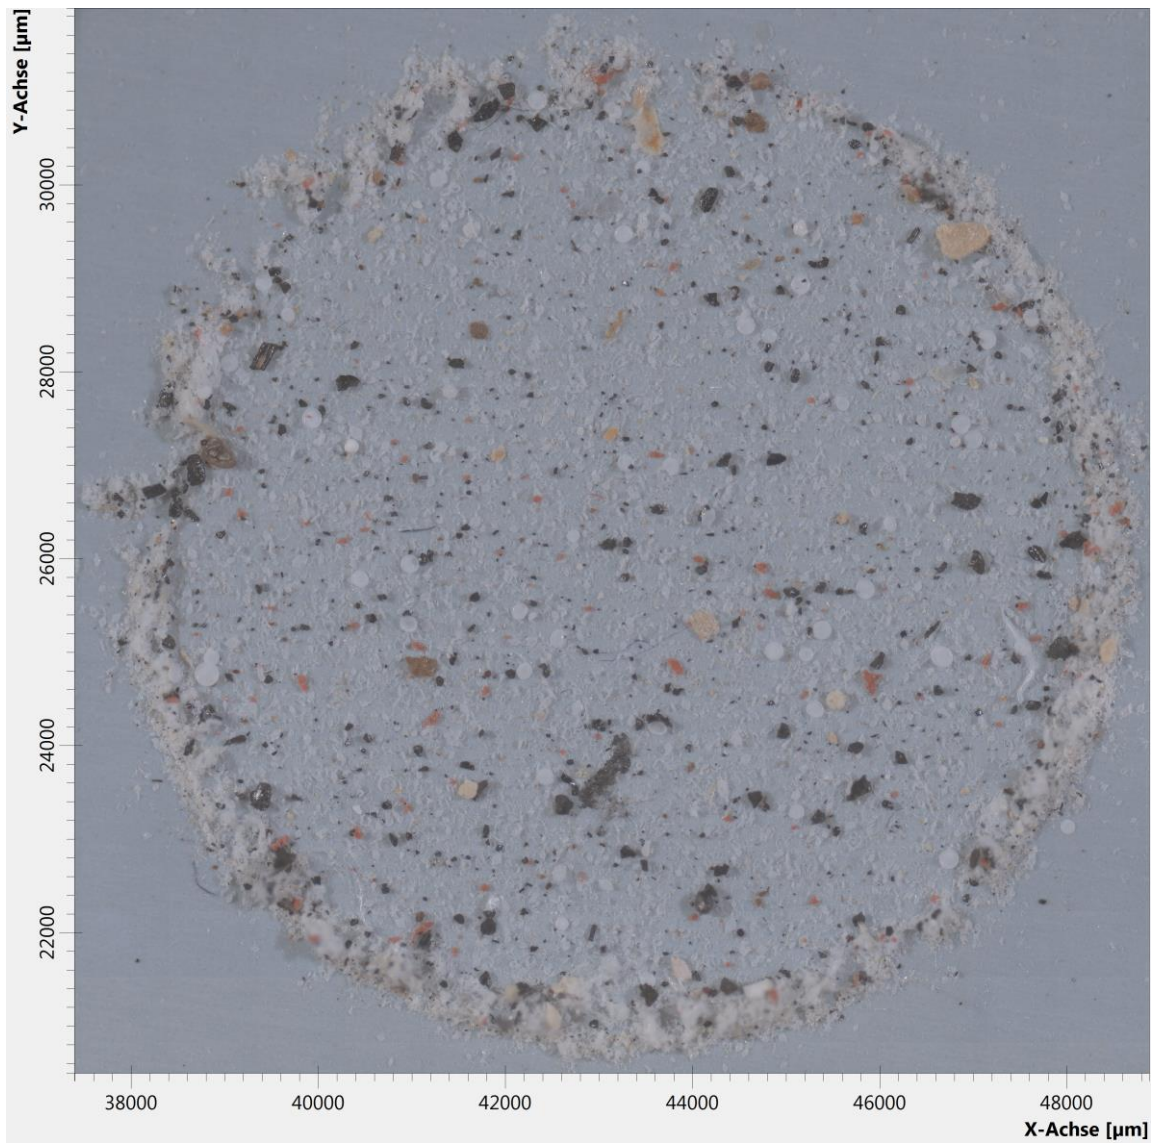

**Fig. S12** Visual overview image of sample RefEnv1.

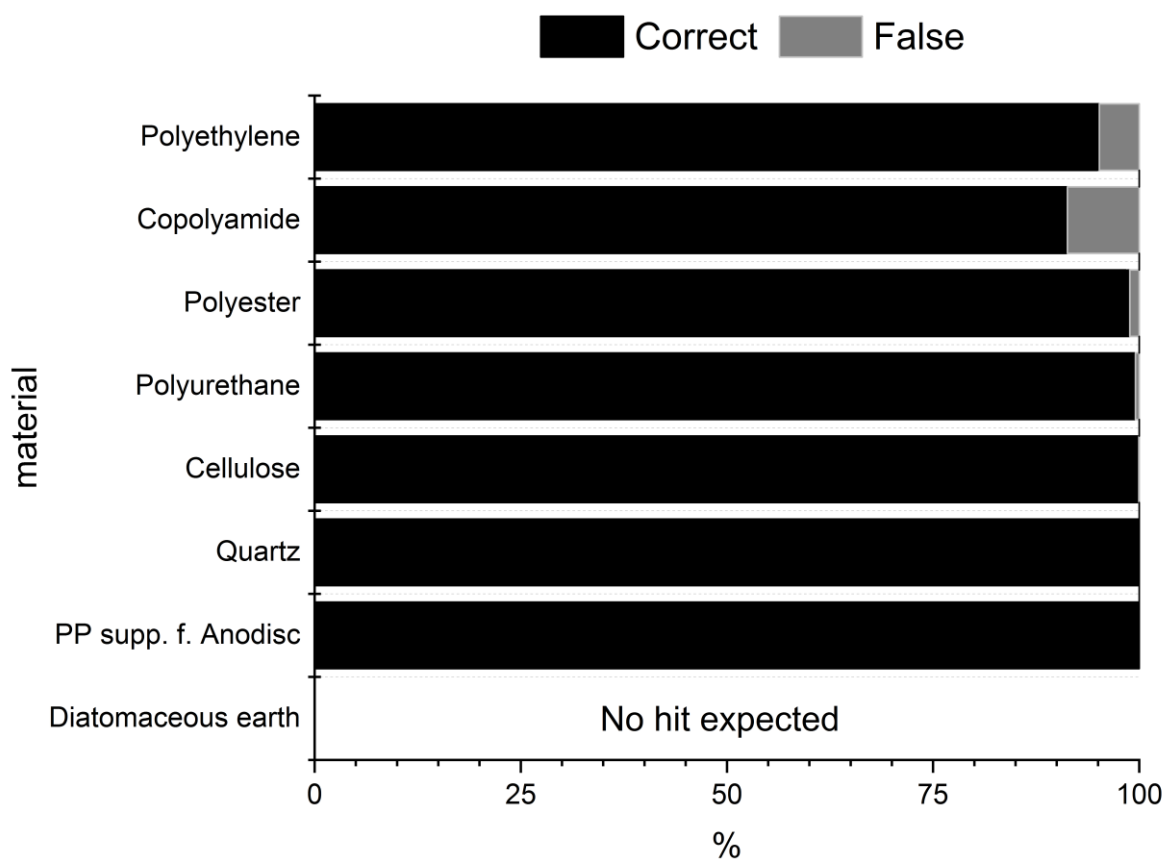

**Fig. S13** Result of the analysis of Ref7P for the materials present on the Anodisc. Diatomaceous earth cannot be determined in the region from 3600-1250  $\text{cm}^{-1}$  yet hampers the analysis of the target materials. Polypropylene (PP) was present from the support ring (supp. f.) of the Anodisc filter material at the corners of the image.

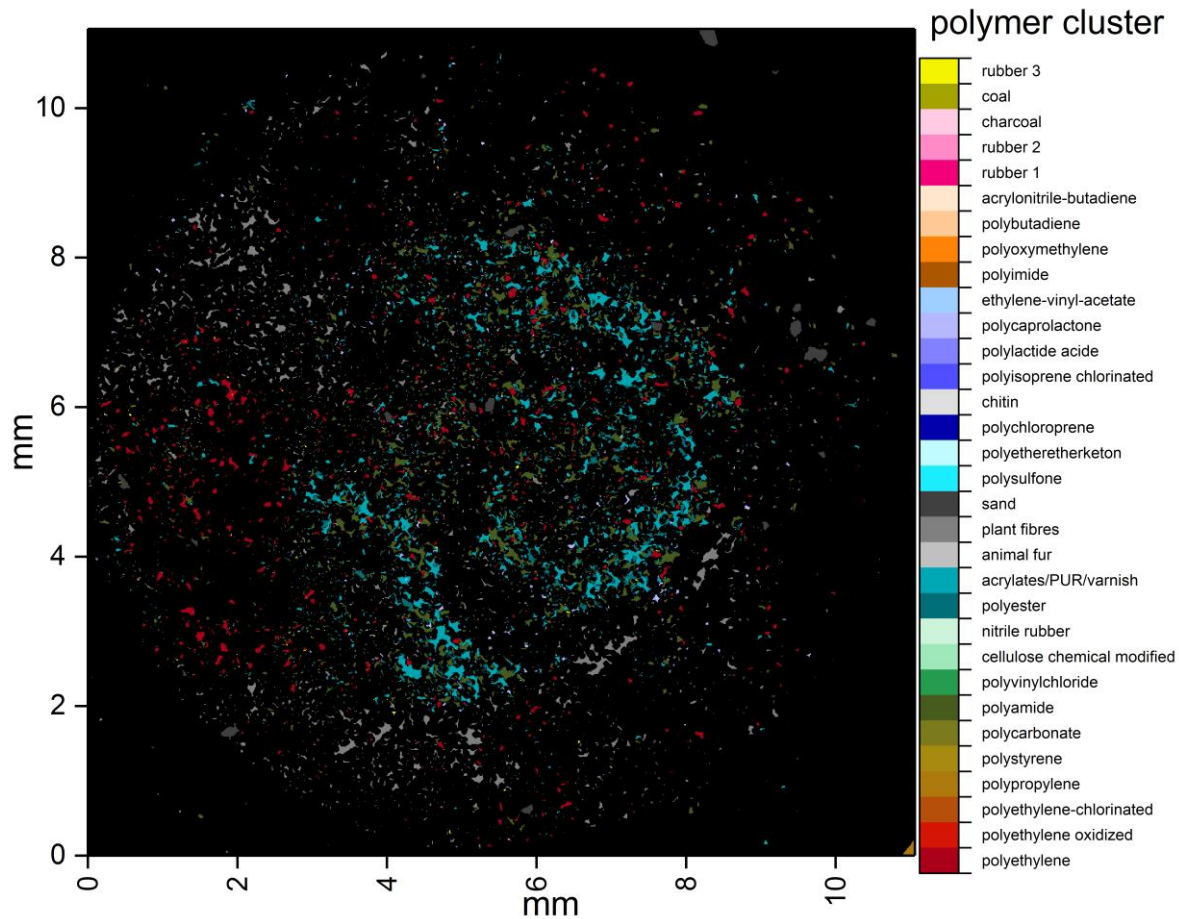

**Fig. S14** False color image of Ref7P after automated analysis.

**Tables:**

**Table S1** Polymers and natural material used for the sample Ref7P with the assigned size range and manufacturer

| polymer                  | size               | manufacturer        |
|--------------------------|--------------------|---------------------|
| Low density polyethylene | 0-80 $\mu\text{m}$ | Schaetti AG         |
| Copolyamide              | 0-80 $\mu\text{m}$ | Schaetti AG         |
| Polyester                | 0-80 $\mu\text{m}$ | Schaetti AG         |
| Polyurethane             | 0-80 $\mu\text{m}$ | Schaetti AG         |
| Quartz                   | Fine granular      | Merck               |
| Cellulose                | Fine powder        | Scientific Polymers |
| Diatomaceous earth       | Fine powder        | Sigma-Aldrich       |

**Table S2** Materials placed on the Anodisc for sample RefA.

| polymer                    | sample form | ATR spectrum | manufacturer              | position on Filter (see Figure S1) |
|----------------------------|-------------|--------------|---------------------------|------------------------------------|
| cellulose                  | foil 40µm   | 034          | Pütz GmbH + Co. Folien KG | a)                                 |
| polypropylene              | foil        | 252          | Orbita Film GmbH          | b)                                 |
| polyamide                  | foil 60 µm  | 158          | mf-folien GmbH            | c)                                 |
| polyethylene terephthalate | foil 175 µm | 174          | Pütz GmbH + Co. Folien KG | d)                                 |
| polycarbonate              | foil 125µm  | 138          | Dr. Dietrich Müller GmbH  | e)                                 |
| polystyrene                | foil 150 µm | 254          | Ergo.fol norflex GmbH     | f)                                 |
| polyethylene, high density | foil        | 080          | Orbita Film GmbH          | g)                                 |
| polyvinylchloride          | foil        | 263          | Leitz                     | h)                                 |
| polyesterurethane          | foil        | 256          | BAYER                     | i)                                 |

**Table S3** Materials placed on the Anodisc for sample RefB.

| polymer                                    | sample form | ATR spectrum | manufacturer                      | position on Filter (see Figure S2) |
|--------------------------------------------|-------------|--------------|-----------------------------------|------------------------------------|
| animal fur                                 | fibre       | 266          | Faserinstitut Bremen              | a)                                 |
| cellulose                                  | fibre       | 104          | Faserinstitut Bremen              | b)                                 |
| methyl vinyl ether / maleic acid copolymer | particle    | 129          | Scientific Polymer Products, Inc. | c)                                 |
| cellulose acetate                          | fibre       | 318          | Gizeh                             | d)                                 |
| styrene acrylonitrile                      | foil 90 µm  | 271          | Ergo.fol norflex GmbH             | e)                                 |
| acrylonitrile butadiene                    | particle    | 005          | Scientific Polymer Products, Inc. | f)                                 |
| ethylene methacrylic acid                  | particle    | 072          | Scientific Polymer Products, Inc. | g)                                 |
| polyoxymethylene                           | particle    | 244          | BASF                              | h)                                 |
| polysulfone                                | particle    | 251          | BASF                              | i)                                 |

**Table S4** Materials placed on the Anodisc for sample RefC.

| polymer                | sample form | ATR spectrum | manufacturer                      | position on Filter (see Figure S3) |
|------------------------|-------------|--------------|-----------------------------------|------------------------------------|
| polylactic acid        | foil 50 µm  | 177          | Pütz GmbH + Co. Folien KG         | a)                                 |
| black rubber           | particle    | 057          | Gardena                           | b)                                 |
| nitrile rubber         | particle    | 145          | Carl Roth GmbH                    | c)                                 |
| polyethylene, oxidized | particle    | 014          | Alroko                            | d)                                 |
| silicone               | particle    | 288          | a2tec GmbH                        | e)                                 |
| polychloroprene        | particle    | 215          | Scientific Polymer Products, Inc. | f) and g)                          |
| chitin                 | particle    | 038          | Natural Sample                    | h)                                 |
| polycaprolactone       | particle    | 211          | Abifor                            | i)                                 |
| sand                   | particle    | 264          | Merck                             | j)                                 |
| animal fur             | fibre       | 314          | Faserinstitut Bremen              | k)                                 |

**Table S5** Materials placed on the Anodisc for sample RefD.

| polymer                                                         | sample form | ATR spectrum | manufacturer                      | position on Filter (see Figure S4) |
|-----------------------------------------------------------------|-------------|--------------|-----------------------------------|------------------------------------|
| aramid                                                          | fibre       | 134          | Dr. Dietrich Müller GmbH          | a)                                 |
| polyimide                                                       | foil 50 µm  | 133          | Dr. Dietrich Müller GmbH          | b)                                 |
| ethylene vinyl alcohol / ethylene vinyl acetate copolymer (40%) | particle    | 076          | Scientific Polymer Products, Inc. | c)                                 |
| black rubber                                                    | particle    | 058          | Gardena                           | d)                                 |
| polyhydroxy butyric acid                                        | particle    | 024          | Biomer                            | e)                                 |
| polybutadiene                                                   | particle    | 001          | Scientific Polymer Products, Inc. | f)                                 |
| polyetheretherketone                                            | fibre       | 218          | Faserinstitut Bremen              | g)                                 |
| polylactic acid                                                 | fibre       | 209          | Faserinstitut Bremen              | h)                                 |
| ethylene vinyl alcohol / ethylene vinyl acetate copolymer (14%) | particle    | 074          | Scientific Polymer Products, Inc. | i)                                 |

**Table S6** Cluster categories for determination of the adaptable database design.

| assigned category | cluster                                                                                                                                                                                                                                                                                                                                                                                                                                                                                                                                                     |
|-------------------|-------------------------------------------------------------------------------------------------------------------------------------------------------------------------------------------------------------------------------------------------------------------------------------------------------------------------------------------------------------------------------------------------------------------------------------------------------------------------------------------------------------------------------------------------------------|
| 1. very important | animal fur<br>polyamide<br>polycarbonate<br>polyethylene / rubber<br>polyethylene, oxidized<br>polyester / polyethylene terephthalate / polybutylene terephthalate<br>plant fibre<br>polypropylene<br>polystyrene / styrene-acrylonitrile<br>polyurethane / varnish<br>polyvinyl chloride<br>sand<br>silicone                                                                                                                                                                                                                                               |
| 2. important      | acrylonitrile butadiene<br>aramid<br>cellulose acetate / -propionate / polyvinylacetate<br>chitin 1<br>ethylene vinyl acetate<br>ethylene vinyl alcohol / -acetate<br>polymethyl methacrylate<br>nitrile rubber<br>polyacetal / polyoxymethylene<br>polybutadiene<br>polycaprolactone<br>polychloroprene<br>polyetheretherketone<br>polyhydroxy butyric acid<br>polyimide<br>polylactic acid<br>polysulfone<br>rubber 1<br>rubber 3<br>silica gel 1                                                                                                         |
| 3. less important | algae 3<br>honeycomb 1<br>honeycomb 2<br>honeycomb 3<br>hydroxypropyl- /methyl cellulose<br>phenoxy resin<br>polyisoprene, chlorinated                                                                                                                                                                                                                                                                                                                                                                                                                      |
| 4. not important  | acrylonitrile butadiene styrene 1<br>acrylonitrile butadiene styrene 2<br>chitin 2<br>ethylene ethyl acrylate<br>ethylene (meth)acrylic acid<br>poly (2,4,6-tribromostyrene)<br>poly(2,6-dimethyl-p-phenylene oxide)<br>polyacrylamide, carboxyl modified<br>polyethylene glycol / -oxide<br>polyphenylene sulfide<br>polyvinylbutyral<br>polyvinylformal<br>polyvinylidene fluoride<br>polyvinylstearate<br>styrene maleic anhydride<br>styrene maleic anhydride partial methyl ester<br>vinyl chloride vinyl acetate<br>vinylidene chloride acrylonitrile |

**Table S7** Materials introduced as transmission FTIR data.

| material                                                        | manufacturer                      | cluster number adaptable database design |
|-----------------------------------------------------------------|-----------------------------------|------------------------------------------|
| polyethylene, high density                                      | Orbita Film GmbH                  | 1                                        |
| polypropylene                                                   | Orbita Film GmbH                  | 4                                        |
| polycarbonate                                                   | Dr. Dietrich Müller GmbH          | 6                                        |
| polyamide                                                       | mf-folien GmbH                    | 7                                        |
| polyethylene terephthalate                                      | Pütz GmbH + Co. Folien KG         | 12                                       |
| cellulose                                                       | Pütz GmbH + Co. Folien KG         | 14                                       |
| polyetheretherketone                                            | Faserinstitut Bremen              | 17                                       |
| polylactic acid                                                 | Pütz GmbH + Co. Folien KG         | 21                                       |
| ethylene vinyl alcohol / ethylene vinyl acetate copolymer (14%) | Scientific Polymer Products, Inc. | 23                                       |
| polyimide                                                       | Dr. Dietrich Müller GmbH          | 24                                       |
| nitrile rubber                                                  | Carl Roth GmbH                    | 10                                       |
| polychloroprene                                                 | Scientific Polymer Products, Inc. | 18                                       |
| polycaprolactone                                                | Abifor                            | 22                                       |
| Fiber jute                                                      | Faserinstitut Bremen              | 14                                       |
| polysulfone                                                     | BASF                              | 16                                       |
| polyoxymethylene                                                | BASF                              | 25                                       |
| cellulose acetate                                               | Gizeh                             | 9                                        |
| acrylonitrile butadiene                                         | Scientific Polymer Products, Inc. | 27                                       |
| polystyrene                                                     | INEOS Styrolution                 | 5                                        |
| polymethyl methacrylate                                         | Plexiglas                         | 12                                       |

**Table S8** General color code for the different clusters.

| cluster number adaptable database design | cluster name                    | RGB in HEX |
|------------------------------------------|---------------------------------|------------|
| 1                                        | polyethylene                    | AC001A     |
| 2                                        | polyethylene oxidized           | D51606     |
| 3                                        | polyethylene-chlorinated        | B64FOA     |
| 4                                        | polypropylene                   | AE7A0D     |
| 5                                        | polystyrene                     | A88A11     |
| 6                                        | polycarbonate                   | 7B7B1C     |
| 7                                        | polyamide                       | 485C1D     |
| 8                                        | polyvinylchloride               | 259C4F     |
| 9                                        | cellulose chemical modified     | 9FE8B9     |
| 10                                       | nitrile rubber                  | CDF3DB     |
| 11                                       | polyester                       | 006F77     |
| 12                                       | acrylates/polyurethanes/varnish | 00A7B5     |
| 13                                       | animal fur                      | C0C0C0     |
| 14                                       | plant fibres                    | 808080     |
| 15                                       | sand                            | 404040     |
| 16                                       | polysulfone                     | 1CEEFF     |
| 17                                       | polyetheretherketone            | BFFBFF     |
| 18                                       | polychloroprene                 | 0000AC     |
| 19                                       | chitin                          | DFDFDF     |
| 20                                       | polyisoprene chlorinated        | 4F4FFF     |

|    |                         |        |
|----|-------------------------|--------|
| 21 | polylactic acid         | 8282FF |
| 22 | polycaprolactone        | B7B7FF |
| 23 | ethylene-vinyl-acetate  | 9FCFFF |
| 24 | polyimide               | AC5600 |
| 25 | polyoxymethylene        | FF8306 |
| 26 | polybutadiene           | FFCA95 |
| 27 | acrylonitrile-butadiene | FFE6CC |
| 28 | rubber type 1           | FA007A |
| 29 | rubber type 2           | FF8AC5 |
| 30 | charcoal                | FFCAE4 |
| 31 | coal                    | A4A400 |
| 32 | rubber type 3           | F4F400 |

**Table S9** Result for the re-analysis of all assigned spectra for the sample RevEnv1 following the methodology described in literature [1].

| cluster | number of spectra analyzed | certain assignment | uncertain assignment | mis assignment |
|---------|----------------------------|--------------------|----------------------|----------------|
| 1       | 45                         | 37                 | 6                    | 2              |
| 4       | 753                        | 602                | 151                  | 0              |
| 5       | 152                        | 152                | 0                    | 0              |
| 6       | 1                          | 1                  | 0                    | 0              |
| 7       | 33                         | 33                 | 0                    | 0              |
| 8       | 30                         | 30                 | 0                    | 0              |
| 11      | 4                          | 2                  | 2                    | 0              |
| 12      | 430                        | 428                | 2                    | 0              |
| 13      | 126                        | 65                 | 41                   | 20             |
| 14      | 4520                       | 3683               | 774                  | 63             |
| 15      | 10                         | 3                  | 4                    | 3              |
| 16      | 495                        | 480                | 15                   | 0              |
| 18      | 1                          | 0                  | 0                    | 1              |
| 19      | 10                         | 8                  | 2                    | 0              |
| 23      | 1                          | 1                  | 0                    | 0              |
| 25      | 3                          | 1                  | 2                    | 0              |
| 32      | 112                        | 41                 | 50                   | 21             |

1. Pimpke S, Lorenz C, Rascher-Friesenhausen R, Gerdt G. An automated approach for microplastics analysis using focal plane array (FPA) FTIR microscopy and image analysis. *Analytical Methods*. 2017;9(9):1499-511. doi:10.1039/c6ay02476a.
